# Supplementary material for: Evolutionary Breakpoints in the Gibbon Suggest Association between Cytosine Methylation and Karyotype Evolution
Source: PubMed Central journal article supplement (PMC2695003; doi:10.1371/journal.pgen.1000538), 2009-06-26
Supplement: pgen.1000538.s005.pdf [file pgen.1000538.s005.pdf]

| BAC                       | BES1 and BES2 (hg18)                                                                                                                                       | Rearrangement                                  | BP name                                                                                                           | BP position                                                                                                                                                | Repeat                                                                          | Segmental duplication                       | Genes (UCSC Ac.Nr or Ref.Seq)                                                       | Putative mechanism                   |
|---------------------------|------------------------------------------------------------------------------------------------------------------------------------------------------------|------------------------------------------------|-------------------------------------------------------------------------------------------------------------------|------------------------------------------------------------------------------------------------------------------------------------------------------------|---------------------------------------------------------------------------------|---------------------------------------------|-------------------------------------------------------------------------------------|--------------------------------------|
| CH271-224A19              | chr14:32617734-32618743<br>chr6:67272170-67272901                                                                                                          | t(HSA14;HSA6)                                  | 224A19_BP_Left<br>224A19_BP_Right                                                                                 | chr14:32656636-32657143<br>chr6:67444870-67445349                                                                                                          | none                                                                            | none                                        | NPA53 (uc001wrs.1)                                                                  |                                      |
| CH271-18385               | chr8:115974044-115974755<br>chr5:20660946-20661339                                                                                                         | t(HSA8;HSA5)<br>Inv(HSA5)                      | 18385_BP1_Left<br>18385_BP1_Right<br>18385_BP2_Left<br>18385_BP2_Right                                            | chr8:116206959-116207470<br>chr5:20662246-20662684<br>chr5:20663011-20663381<br>chr5:20661769-20662230                                                     | none                                                                            | none                                        |                                                                                     | NHEJ (GA homology)                   |
| CH271-228C1               | chr7:79789663-79790600<br>chr20:16651858-16651083                                                                                                          | t(HSA7;HSA20)                                  | 228C1_BP_Left<br>228C1_BP_Right                                                                                   | chr7:798892914-79893600<br>chr20:16576945-16577328                                                                                                         | (TA)n simple repeat (318bp)/flanking                                            | none                                        | CD36 antigen (uc003uhc.1)                                                           | Stem-Loop fragility                  |
| CH271-228N13              | chr10:56218669-56219382<br>chr10:88936450-88935739                                                                                                         | Inv(HSA10)                                     | 228N13_BP_Left<br>228N13_BP_Right                                                                                 | chr10:56188874-56189350<br>chr10:88788971-88789386                                                                                                         |                                                                                 | hSD at 11kb from BP<br>hSD at 17kb from BP  | PCDH15 (uc001juu.1)                                                                 |                                      |
| CH271-228P23              | chr3:197132159-197133169<br>chr5:175546939-175548355                                                                                                       | Inv(HSA3)<br>t(HSA3;HSA5)                      | 228P23_BP1_Left<br>228P23_BP1_Right<br>228P23_BP2_Left<br>228P23_BP2_Right                                        | chr3:197102596-197103088<br>chr3:196942308-196943209<br>chr3:196989840-196990455<br>chr5:175653028-175653875                                               | AluSp/q<br>Tandem-SVA-(GAAA)n<br>L1ME4a                                         |                                             | TNK2 (uc003fvs.1)<br>MUC20 (NM_152673)<br>MUC4 (uc003fuz.1)<br>CSorf25 (uc003mdr.1) |                                      |
| CH271-236L11              | chr2:131700083-131701676<br>chr4:48737170-48734080<br>chr2:73408992-73409723<br>chr17 Ambiguous                                                            | t(HSA2;HSA8)<br>t(HSA8;HSA4)<br>t(HSA17;HSA2)  | 236L11_BP1_Left<br>236L11_BP1_Right<br>236L11_BP2_Left<br>236L11_BP2_Right<br>246M2_BP_Left<br>246M2_BP_Right     | chr2:4398611-4399410<br>chr8:4361959-4362806<br>chr4:48761701-48762682<br>chr2:73461817-73462374                                                           | Ambiguous mapping<br>L1P/L1<br>AluSx<br>Block of repeats<br>LTR -AluJ-LTR       |                                             | CSMD1 (uc003wqd.1)<br>CSMD1 (uc003wqd.1)                                            |                                      |
| CH271-246M2               | chr5:54009550-54006867<br>chr16:16100208-16100751                                                                                                          | t(HSA5;HSA16)                                  | 254H12_BP_Left<br>254H12_BP_Right                                                                                 | chr5:54116622-54116963<br>chr16:28539672-28540248                                                                                                          | AluSx-(AT)n-BP-(AT)n                                                            | hSD and gSD                                 | SULT1A1 (uc002dqm.1)                                                                |                                      |
| CH271-254H12              | chr22:32009319-32010312                                                                                                                                    | Inv(HSA22)                                     | 263C9_BP1_Left<br>263C9_BP1_Right                                                                                 | chr22:31971622-31972151<br>chr22:30928393-30928889                                                                                                         | Block of repeats                                                                | hSD                                         | RFPL2 (uc003ame.1)                                                                  |                                      |
| CH271-263C9               | chr4:140563504-140564165                                                                                                                                   | t(HSA22;HSA4)                                  | 263C9_BP2_Left<br>263C9_BP2_Right                                                                                 | chr22:31046644-31047107<br>chr4:140587411-140587918                                                                                                        | AluSg<br>C HERVL-int LTR (ERVL)                                                 |                                             | AK126764 (hypothetical)                                                             | NHEJ -gggttcaggg-filling             |
| CH271-261L1               | chr1:52150331-52151147<br>chr1:17944362-179415103                                                                                                          | Inv(HSA1)                                      | 261L1_BP_Left<br>261L1_BP_Right                                                                                   | chr1:52327906-52328412<br>chr1:179425508-179425921                                                                                                         | none                                                                            | gSD                                         |                                                                                     | NHEJ "aaggtg" homology               |
| CH271-262E11              | chr1:759260052-59260792<br>chr2:27718116-27718928                                                                                                          | t(HSA17;HSA2)                                  | 262E11_BP_Left<br>262E11_BP_Right                                                                                 | chr1:759312447-59313017<br>chr2:27780363-27780861                                                                                                          | AluS                                                                            | gSD and hSD                                 | GH2(uc002jcl.1); CSH1 (uc002jck.1)                                                  | Alu-Alu recombination (Figure 1)     |
| CH271-267G23              | chr2:99339634-99340501**<br>chr17:77747544-77748535                                                                                                        | t(HSA17;HSA2)                                  | 267G23_BP_Left<br>267G23_BP_Right                                                                                 | chr2:99288205-99289050<br>chr17:77869060-77870607                                                                                                          | Block of repeats<br>(CG)n-simple repeat                                         | gSD<br>gSD                                  |                                                                                     |                                      |
| CH271-78K20               | chr4:117336722-117337842<br>chr16:16033332-16034231**                                                                                                      | t(HSA4;HSA16)                                  | 78K20_BP_Left<br>78K20_BP_Right                                                                                   | chr4:117280534-117281120<br>chr16:16101960-16102505                                                                                                        | AluSg/x                                                                         | gSD<br>gSD                                  | ABCC1 (uc002dee.1)                                                                  | NHEJ -aattccaa-filling               |
| CH271-86M19               | chr7:80017020-80017854<br>chr20:16553059-16553552                                                                                                          | t(HSA7;HSA20)                                  | 86M19_BP_Left<br>86M19_BP_Right                                                                                   | chr7:80017020-80017854<br>chr20:16553059-16553552                                                                                                          | (AT)n-simple repeat                                                             | gSD                                         | CD36 antigen (uc003uhc.1)                                                           | NHEJ -attccagcatatattagg-filling     |
| CH271-275G5               | chr7:72639276-72639991<br>chr7:99624194-99625196                                                                                                           | Inv(HSA7)                                      | 275G5_BP_Left<br>275G5_BP_Right                                                                                   | Ambiguous mapping<br>Ambiguous mapping                                                                                                                     |                                                                                 | hSD                                         | BAZ18 (uc003tvc.1)                                                                  |                                      |
| CH271-350B17              | chr4:117032787-117033832<br>chr5:54236459-54237267                                                                                                         | t(HSA4;HSA16)<br>t(HSA16;HSA5)                 | 350B17_BP1_Left<br>350B17_BP1_Right<br>350B17_BP2_Left<br>350B17_BP2_Right<br>350B17_BP3_Left<br>350B17_BP3_Right | chr4:117240577-117241153<br>chr16:16111050-16111587<br>chr16:16118590-16119249<br>Ambiguous mapping<br>Ambiguous mapping<br>chr5:54203270-54203913         | L2b/LINE2<br>AluSx<br>L1-AluSx-L1<br>Ambiguous mapping<br>L1M2/L1-AluSx-L1M2/L1 | gSD<br>gSD                                  | ABCC1 (uc002dee.1)                                                                  | NAHR between ABCC1-ABCC6             |
| CH271-398E1               | chr17:69796721-69797532<br>chr17:20753342-20754118                                                                                                         | Inv(HSA17)_1<br>Inv(HSA17)_2                   | 398E1_BP1_Left<br>398E1_BP1_Right<br>398E1_BP2_Left<br>398E1_BP2_Right                                            | chr17:69836813-69837369<br>chr17:64467113-64467721<br>chr17:64442878-64443431<br>chr17:20784634-20787025                                                   | AluSc<br>L1PA16/L1-THE18/LTR<br>L1P5/LINE-L1M5/L1-1AluYd8-(CA)n-AluYd8-L1M5/L1  |                                             | KIF19 (uc002jk.1)<br>ABC8 (uc002jhp.1)<br>ABC8 (uc002jhp.1)                         | Alu-Alu recombination (Figure1)      |
| CH271-286K22              | chr7:101923026-101923857<br>chr7:75864301-75865131                                                                                                         | Inv(HSA7)                                      | 286K22_BP_Left<br>286K22_BP_Right                                                                                 | chr7:101978533-101978861<br>chr7:75987975-75988443                                                                                                         | AluJo_1-AluSx_1-AluJo_1-AluSx_2-AluJo_1-AluSx_4                                 | hSD<br>hSD                                  | UPK38 (uc003ufq.1)                                                                  | NAHR of hSD                          |
| CH271-298N13 centromeric  | chr18:14626725-14627692<br>chr2:130451700-130452248<br>chr2:130315436-130316178<br>chr8:4317303-4317902<br>chr8:4260896-4261577<br>chr18:72396578-72397187 | t(HSA18;HSA2)<br>t(HSA2;HSA8)<br>t(HSA8;HSA18) | 298N13_BP1_Left<br>298N13_BP1_Right<br>298N13_BP2_Left<br>298N13_BP2_Right<br>298N13_BP3_Left<br>298N13_BP3_Right | chr18:14624361-14624802<br>chr2:130451700-130452248<br>chr2:130315436-130316178<br>chr8:4317303-4317902<br>chr8:4260896-4261577<br>chr18:72396578-72397187 | (CA)n-simple repeat -AluSc-AluJb<br>L1PA6/L1-L1ME3A/L1                          | hSD<br>hSD<br>gSD<br>gSD<br>hSD             |                                                                                     | NHEJ "CT" homology                   |
| CH271-372B11 centromeric  | chr14:19379603-19491075<br>chr2:36968096-36968623<br>chr9:98027851-98028324<br>chr9:97415689-97416270<br>chr6:151263070-151263234                          | t(HSA14;HSA2)<br>t(HSA2;HSA9)<br>t(HSA9;HSA6)  | 372B11_BP1_Left<br>372B11_BP1_Right<br>372B11_BP2_Left<br>372B11_BP2_Right<br>372B11_BP3_Left<br>372B11_BP3_Right | Ambiguous mapping<br>chr2:36968096-36968623<br>chr9:98027851-98028324<br>chr9:97415689-97416270<br>chr6:151263070-151263234                                | L1M4c/L1-L1M1/L1-CL2/L2<br>BP1-AluJ/FRAM -BP2-MLT1G3/LTR-L1MD/L1-AluJo          | gSD<br>gSD<br>gSD<br>gSD                    |                                                                                     | Alu-Alu recombination<br>NAHR of gSD |
| CH271-446I8 centromeric   | chr7:100735913-100736921<br>chr7:68133693-68134788                                                                                                         | Inv(HSA7)                                      | 446I8_BP_Left<br>446I8_BP_Right                                                                                   | chr7:100731021-100731650<br>chr7:68241607-68242220                                                                                                         | AluSx -L1P3/1<br>L1ME/L1-AluSx-L1ME/L1                                          |                                             |                                                                                     | Alu-Alu recombination                |
| CH271-261K6 HSA specific  | chr3:131140276-131141065<br>chr3:15040075-15040867                                                                                                         | Inv(HSA3)                                      | 261K6_BP_Left<br>261K6_BP_Right                                                                                   | chr3:131200116-131200598<br>chr3:15138527-15139113                                                                                                         | MIR (broken in human)<br>MIR-LTR16B2/LTR-MLT1D/LTR                              | hSD on other side<br>gSD, hSD on other side |                                                                                     | NAHR of hSD in human                 |
| CH271-261A22 HSA specific | chr7:7101310-7102318<br>chr7:97207081-97207691                                                                                                             | Inv(HSA7)                                      | 261A22_BP_Left<br>261A22_BP_Right                                                                                 | chr7:7006371-7006881<br>chr7:97340602-97341177                                                                                                             | FLAM/SINE-LTR33/ERVL                                                            | hSD<br>hSD                                  |                                                                                     | NAHR of hSD in human                 |

| BAC            | BES1 and BES2 (hg18)                                 | Rearrangement                                       | BP name                           | BP position                                          | Repeat                                              | Segmental duplication                    | Genes (UCSC Ac.Nr or Ref.Seq)                      | Putative mechanism              |                                                      |  |
|----------------|------------------------------------------------------|-----------------------------------------------------|-----------------------------------|------------------------------------------------------|-----------------------------------------------------|------------------------------------------|----------------------------------------------------|---------------------------------|------------------------------------------------------|--|
| Shotgun Pool   | CH271-125L9                                          | chr3:147740472-147741241<br>chr12:45807865-45808660 | t(HSA3;HSA12)                     | 125L9_BP_Left<br>125L9_BP_Right                      | chr3:147732628-147732918<br>chr12:45890669-45891125 | none                                     | gSD<br>PLSCR1 (uc003evx.1)<br>FAM113B (uc001rpn.1) |                                 |                                                      |  |
|                | CH271-141K21                                         | chr9:113404746-113404882<br>chr9:22218708-22218920  | Inv(HSA9)                         | 141K21_BP_Left<br>141K21_BP_Right                    | chr9:113460127-113460458<br>chr9:22288734-22289442  | L1M1/L1                                  | LOC552891 (uc004ofn.1)                             |                                 |                                                      |  |
|                | CH271-185K6                                          | chr14:30838138-30838392<br>chr14:73124155-73124877  | Inv(HSA14)                        | 185K6_BP_Left<br>185K6_BP_Right                      | chr14:30885515-31679560<br>chr14:73091554-73091829  | AluY<br>L1M1/L1                          | HEATR4 (uc001xoj.1)                                |                                 |                                                      |  |
|                | CH271-18C15                                          | chr6:9423952-9424795<br>chr11:32321052-32321338     | t(HSA6;HSA11)                     | 18C15_BP_Left<br>18C15_BP_Right                      | chr6:9375117-9375652<br>chr11:32145365-32145812     | none                                     | gSD<br>gSD                                         |                                 |                                                      |  |
|                | CH271-241J10                                         | chr1:54907463-54907795<br>chr1:211021684-211022133  | Inv(HSA1)                         | 241J10_BP_Left<br>241J10_BP_Right                    | chr1:55009636-55010105<br>chr1:211097036-211097354  | L2a/L2                                   | gSD                                                | NHEJ -AAAAAAAAATTTCT-filling    |                                                      |  |
|                | CH271-274L1                                          | chr17:69720630-69721057                             | Inv(HSA17)_1                      | 274L1_BP1_Left                                       | chr17:69833458-69833569                             | Alu                                      |                                                    | RAB37 (uc002jle.1)              | NHEJ -TGGTATGGAGCGACCTCA-filling                     |  |
|                |                                                      |                                                     |                                   | 274L1_BP1_Right                                      | chr17:70243897-70244356                             |                                          |                                                    |                                 |                                                      |  |
|                |                                                      |                                                     |                                   | 274L1_BP2_Left                                       |                                                     |                                          |                                                    |                                 |                                                      |  |
|                |                                                      |                                                     |                                   | 274L1_BP2_Right                                      |                                                     |                                          |                                                    |                                 |                                                      |  |
|                |                                                      |                                                     |                                   |                                                      |                                                     |                                          | No Breakpoint Information                          |                                 |                                                      |  |
|                | CH271-330D2                                          | chr16:73591531-73592258<br>chr5:132444217-132444431 | t(HSA16;HSA5)                     | 330D2_BP_Left<br>330D2_BP_Right                      | chr16:73411618-73411924<br>chr5:132470668-132471176 | L1<br>AluIb at 210bp                     |                                                    |                                 | NHEJ "CA" homology                                   |  |
|                | CH271-362G10                                         | chr6:27185623-27186149<br>chr9:30805082-30806750    | t(HSA6;HSA9)                      | 362G10_BP_Left<br>362G10_BP_Right                    | chr6:27133029-27133530<br>chr9:30938218-30938483    | L1MEC/L1                                 | gSD                                                |                                 |                                                      |  |
|                | CH271-405A9                                          | chr2:27994865-27994148<br>chr17:59333868-59333191   | t(HSA2;HSA17)_RecCH271-262E11     | 405A9_BP_Left<br>405A9_BP_Right                      | chr2:27780864-27781537<br>chr17:59313018-59313274   | MIR3-AluSg/x                             |                                                    |                                 |                                                      |  |
|                | CH271-44A23                                          | chr7:2700908-2701376<br>chr2:150152851-150153542    | t(HSA7;HSA2)                      | 44A23_BP_Left                                        | chr7:2619384-2620096                                |                                          |                                                    |                                 |                                                      |  |
|                |                                                      |                                                     |                                   | 44A23_BP_Right                                       | chr2:150079919-150080449                            | AluS                                     |                                                    |                                 |                                                      |  |
|                | CH271-171B20                                         | chr9:32478670-32479624                              | Inv(HSA9)_1                       | 171B20_BP1_Left                                      | chr9:32478468-32478924                              | AluSx                                    |                                                    |                                 | NHEJ -ATACTACATATAGATA(TA) <sub>n</sub> TCCT-filling |  |
|                |                                                      |                                                     |                                   | 171B20_BP1_Right                                     | chr9:38261234-38261674                              |                                          |                                                    |                                 |                                                      |  |
|                |                                                      |                                                     |                                   | 171B20_BP2_Left                                      | chr9:38779194-38779598                              |                                          |                                                    |                                 |                                                      |  |
|                |                                                      |                                                     |                                   | 171B20_BP2_Right                                     | chr9:27256349-27256935                              |                                          |                                                    |                                 |                                                      |  |
|                |                                                      |                                                     |                                   |                                                      |                                                     |                                          | No Breakpoint sequence                             |                                 |                                                      |  |
|                | CH271-185E17                                         | chr8:62776249-62776628<br>chr8:99254477-99255380    | Inv(HSA8)                         | 185E17_BP_Left<br>185E17_BP_Right                    | chr8:62850735-62850926<br>chr8:99136628-99137178    | AluSg/x                                  |                                                    |                                 |                                                      |  |
|                | CH271-122E24                                         | chr6:46029203-4603778<br>chr2:168833875-168834096   | t(HSA6;HSA2)                      | 122E24_BP_Left<br>122E24_BP_Right                    | chr6:46224094-46224375<br>chr2:168921485-168921828  | AluY(TTTA) <sub>n</sub> -AluY            |                                                    |                                 |                                                      |  |
|                | CH271-40A18                                          | chr6:46243705-46246528<br>chr2:168943139-168960712  | t(HSA6;HSA2)_RecCH271-122E24      | 40A18_BP_Left<br>40A18_BP_Right                      | chr6:46244450-46244952<br>chr2:168941518-168941810  | (TA) <sub>n</sub><br>L1                  |                                                    |                                 |                                                      |  |
|                | CH271-449L10                                         | chr12:63651232-63652094<br>chr19:41725837-41726391  | t(HSA12;HSA19)                    | 449L1_BP_Left<br>449L1_BP_Right                      | chr12:63657426-63657984<br>chr19:41824636-41824883  | AluIb                                    |                                                    |                                 | NHEJ -AAAA-filling                                   |  |
|                | CH271-234B14                                         | chr3:19775959-19776713<br>chr8:20169960-20170244    | t(HSA3;HSA8)                      | 234B14_BP_Left<br>234B14_BP_Right                    | chr3:19801280-19801846<br>chr8:19972153-19972405    | Trigger3b DNA/MER2<br>THE1A/LTR-L1MA3/L1 |                                                    |                                 |                                                      |  |
|                | CH271-49C12                                          | chr17:55502427-55503122                             | Inv(HSA17)_1                      | 49C12_BP1_Left                                       | chr17:55479737-55479892                             |                                          |                                                    | ABC1 (uc002iyk.1)               |                                                      |  |
|                |                                                      |                                                     |                                   | 49C12_BP1_Right                                      | chr17:27828000-27828705                             |                                          |                                                    | PSMD11 (uc002zhm.1)             |                                                      |  |
|                |                                                      |                                                     |                                   | 49C12_BP2_Left                                       | Missing                                             |                                          |                                                    |                                 |                                                      |  |
|                |                                                      |                                                     |                                   | 49C12_BP2_Right                                      | Missing                                             | AluY                                     |                                                    |                                 |                                                      |  |
|                | CH271-107F17                                         | chr22:32050317-32050909<br>chr22:31006873-31007483  | Inv(HSA22)                        | 107F17_BP_Left<br>107F17_BP_Right                    | chr22:31971471-31971840<br>chr22:30920732-30920843  | HSMAR2/Mariner-AluSx- HSMAR2/Mariner     | HSD                                                | RFPL2 (uc003ame.1)              |                                                      |  |
| CH271-114O8    | chr5:75772933-75773648<br>chr16:19525951-19526628    | t(HSA5;HSA16)                                       | 114O8_BP_Left<br>114O8_BP_Right   | chr5:75703809-75704511<br>chr16:19419664-19419762    |                                                     |                                          |                                                    | NHEJ-ATGATG-filling             |                                                      |  |
| CH271-247C2    | chr2:99193372-99193548<br>chr17:77943112-77943299    | t(HSA2;HSA17)_RecCH271-267G23                       | 247C2_BP_Left<br>247C2_BP_Right   | chr2:99287211-99287966<br>chr17:77869210-77870732    | AluY                                                |                                          |                                                    |                                 |                                                      |  |
| CH271-438C12   | chr10:52579011-52579213<br>chr14:35365902-35365957   | t(HSA10;HSA14)                                      | 438C12_BP_Left<br>438C12_BP_Right | chr10:52595969-52596550<br>chr14:106265726-106265962 | MSTA/LTR                                            |                                          | PRKG1 (uc001jlm.1)<br>abParts (uc001yrq.1)         | NHEJ-AAC-filling                |                                                      |  |
| CH271-383H22   | chr3:194767531-194767746                             | Inv(HSA3)_1                                         | 383H22_BP1_Left                   | chr3:194750831-194751067                             | AluIb                                               |                                          |                                                    | Alu-Alu recombination           |                                                      |  |
|                |                                                      |                                                     | 383H22_BP1_Right                  | chr3:198930706-198931429                             | L1MA6/L1                                            |                                          |                                                    |                                 |                                                      |  |
|                |                                                      |                                                     | 383H22_BP2_Left                   | Missing                                              |                                                     |                                          |                                                    |                                 |                                                      |  |
|                |                                                      |                                                     | 383H22_BP2_Right                  | Missing                                              |                                                     |                                          |                                                    |                                 |                                                      |  |
| Trace Archives | Trace:1744822164                                     | Inv(HSA17)_RecCH271-389E1                           | Rec_398E1_BP_Left                 | chr17:64468378-64468996                              | Charlie                                             |                                          |                                                    | NHEJ-GAAATAGAAATAAAAAAC-filling |                                                      |  |
|                |                                                      |                                                     | Rec_398E1_BP_Right                | chr17:69838399-69838549                              |                                                     |                                          | KIF19 (uc002jkj.1)                                 |                                 |                                                      |  |
|                |                                                      |                                                     | 119L13_BP_Left                    | chr19:44009702-44014702                              |                                                     |                                          | HNRNP1 (uc002ojk.1); ECH1 (uc002oji.1)             |                                 |                                                      |  |
|                |                                                      |                                                     | 119L13_BP_Right                   | chr7:23062779-23067779                               |                                                     |                                          |                                                    |                                 |                                                      |  |
|                |                                                      |                                                     | 262E15_BP_Left                    | chr4:18720237-18720737                               |                                                     |                                          |                                                    |                                 |                                                      |  |
|                |                                                      |                                                     | 262E15_BP_Right                   | chr4:185309892-185314892                             |                                                     |                                          | ENPP6 (uc003iwc.1)                                 |                                 |                                                      |  |
|                |                                                      |                                                     | 401L9_BP_Left                     | chr10:23994393-23999393                              |                                                     |                                          |                                                    |                                 |                                                      |  |
|                |                                                      |                                                     | 401L9_BP_Right                    | chr4:110501558-110506558                             |                                                     |                                          |                                                    |                                 |                                                      |  |
|                |                                                      |                                                     | 457L13_BP_Left                    | chr22:31042892-31047892                              | No Breakpoint sequence                              |                                          |                                                    |                                 |                                                      |  |
|                |                                                      |                                                     | 457L13_BP_Right                   | chr4:140586473-140591473                             |                                                     |                                          |                                                    |                                 |                                                      |  |
| CH271-300N11   | chr10:11957906-11958581<br>chr10:15049040-15049323   | Inv(HSA10)                                          | 300N11_BP_Left<br>300N11_BP_Right | chr10:12128225-12133225<br>chr10:15063576-15068576   |                                                     | HSD<br>gSD                               |                                                    | No Breakpoint sequence          |                                                      |  |
| CH271-274K2    | chr2:128217917-128218714<br>chr2:131832424-131832748 | Inv(HSA2)                                           | 274K2_BP_Left<br>274K2_BP_Right   | chr2:128110049-128115049<br>chr2:131905153-131910153 |                                                     |                                          | LIMS2 (uc002tou.1)                                 |                                 |                                                      |  |
| CH271-322A3    | chr13:38382334-38382944<br>chr13:22312091-22312355   | Inv(HSA13)                                          | 322A3_BP_Left<br>322A3_BP_Right   | chr13:38336699-38341699<br>chr13:23436399-23441399   |                                                     |                                          | FREM2 (uc001uuv.1)                                 |                                 |                                                      |  |

|          | BAC                       | BES1 and BES2 (hg18)                                 | Rearrangement | BP name | BP position | Repeat | Segmental duplication | Genes (UCSC Ac.Nr or Ref.Seq) | Putative mechanism |                |
|----------|---------------------------|------------------------------------------------------|---------------|---------|-------------|--------|-----------------------|-------------------------------|--------------------|----------------|
| BES Only | CH271-212J20              | chr15:28990033-28990789<br>chr15:30748924-30749757   | Inv(HSA15)    |         |             |        |                       |                               |                    |                |
|          | CH271-219C13/CH271-156E13 | chr2:73614518-73615293<br>chr17:61651667-61651884    | t(HSA2;HSA17) |         |             |        |                       |                               |                    |                |
|          | CH271-219C17              | chr17:20464920-20494920<br>chr17:57601971-57631971   | Inv(HSA17)    |         |             |        |                       |                               |                    |                |
|          | CH271-186A1               | chr6:57494796-57495539<br>chr6:62082461-62083238     | Inv(HSA6)     |         |             |        |                       |                               |                    |                |
|          | CH271-144D7               | chr17:33747350-33748174<br>chr17:43053145-43053947   | Inv(HSA17)    |         |             |        |                       |                               |                    |                |
|          | CH271-144P05              | chr17:43030034-43030452<br>chr17:45903313-45904103   | Inv(HSA17)    |         |             |        |                       |                               |                    |                |
|          | CH271-244C18              | chr6:26665529-26666210<br>chr6:58278082-58278396     | Inv(HSA6)     |         |             |        |                       |                               |                    |                |
|          | CH271-133C19              | chr17:27546813-27547000<br>chr17:26246352-26246485   | Inv(HSA17)    |         |             |        |                       |                               |                    |                |
|          | CH271-362O01              | chr2:114170325-114170537<br>chr2:132955805-132956199 | Inv(HSA2)     |         |             |        |                       |                               |                    |                |
|          | CH271-314F10              | chr18:10502587-10502787<br>chr18:12104383-12105287   | Inv(HSA18)    |         |             |        |                       |                               |                    |                |
|          | CH271-10M04               | chr11:3137758-3138457<br>chr11:70938138-70938965     | Inv(HSA11)    |         |             |        |                       |                               |                    |                |
|          | CH271-316D01              | chr12:50750486-50750968<br>chr3:76165224-76165428    | t(HSA12;HSA3) |         |             |        |                       |                               |                    |                |
|          | CH271-380N5               | chr3:58787556-58788437<br>chr12:120366540-120367347  | t(HSA12;HSA3) |         |             |        |                       |                               |                    |                |
|          | CH271-461L14              | chr13:26172852-26173025<br>chr1:202036523-202037082  | t(HSA13;HSA1) |         |             |        |                       |                               |                    |                |
|          | CH271-202N11              | chr10:51751461-51752217<br>chr10:52229449-52229635   | Inv(HSA10)    |         |             |        |                       |                               |                    |                |
|          | CH271-263M06              | chr7:102292933-102293699<br>chr7:92995033-92995531   | Inv(HSA7)     |         |             |        |                       |                               |                    |                |
|          | CH271-267G21              | chr17:55284622-55285294<br>chr17:57642889-57643214   | Inv(HSA17)    |         |             |        |                       |                               |                    |                |
|          | CH271-26L7                | chr17:45966195-45967178<br>chr17:30504099-30504910   | Inv(HSA17)    |         |             |        |                       |                               |                    |                |
|          | CH271-134D13              | chrX:34418293-34418679<br>chrX:63295824-63296135     | Inv(HSAX)     |         |             |        |                       |                               |                    |                |
|          | CH271-64D21               | chrX:36155073-36155711<br>chrX:34207559-34208240     | Inv(HSAX)     |         |             |        |                       |                               |                    |                |
|          | CH271-262O07              | chr8:116011454-116012115<br>chr5:20660956-20661663   | t(HSA8;HSA5)  |         |             |        |                       |                               |                    |                |
|          | CH271-30L2                | chr19:5851377-5851846<br>chr19:51500098-51500471     | Inv(HSA19)    |         |             |        |                       |                               |                    |                |
|          | CH271-74B2                | chr17:61598754-61599496<br>chr17:20111039-20111836   | Inv(HSA17)    |         |             |        |                       |                               |                    |                |
|          | CH271-216H2               | chr10:52022220-52023160<br>chr10:89294947-89295755   | Inv(HSA10)    |         |             |        |                       |                               |                    |                |
|          | False Positives           | CH271-16A10                                          |               |         |             |        |                       |                               |                    |                |
|          |                           | CH271-146B14                                         |               |         |             |        |                       |                               |                    | No Breakpoints |
|          |                           | CH271-188I7                                          |               |         |             |        |                       |                               |                    | No Breakpoints |

No Breakpoint mapping Information

No Breakpoints
